# Supplementary material for: Is the use of diagnostic imaging and the self-reported clinical management of low back pain patients influenced by the attitudes and beliefs of chiropractors? A survey of chiropractors in the Netherlands and Belgium
Source: Springer Nature journal article supplement (doi:10.1186/s12998-023-00523-y), 2024-01-08
Supplement: MOESM2 [file 26606632]

# A survey of the attitudes of Dutch chiropractors towards the use of

## Start of Survey

Thank you for participating in this survey.

The survey is about the use of diagnostic imaging by chiropractors in the Netherlands.

The survey will consist of 6 parts.

Part 1: Demographic and practice characteristics

Part 2: Radiographs

Part 3: Opinions

Part 4: Practice Guidelines

Part 5: Clinical Vignettes

Part 6: Attitudes and beliefs of chiropractors towards back pain

It will take approximately 30-45 minutes to complete the questionnaire and the response will be kept confidential and anonymous.

At ANY time you can pause the questionnaire and return to finish the questionnaire later.

Please press next to start the survey.

## Part 1: Demographic and Practice Characteristics

In this section, there are questions about your background and the general characteristics of your practice. The information will be used for data analysis only. Please check the appropriate box, fill in the blank, or circle the appropriate number, as required.

### \*1. Gender

- Male  
 Female

### \*2. Age

Years

### \*3. Nationality

- Dutch  
 Other, please specify:

## Part 1: Demographic and Practice Characteristics

### \*4. What year did you graduate from chiropractic college?

Year

# A survey of the attitudes of Dutch chiropractors towards the use of

## \*5. Which chiropractic college did you graduate:

College:

Country:

## \*6. When did you start working as a chiropractor?

Year

## \*7. Did you have another degree before you started your chiropractic career?

- No
- Yes, please specify the degree(s):

## \*8. Have you completed postgraduate chiropractic training?

- Yes
- No

## Part 1: Demographic and Practice Characteristics

### \*9. Which postgraduate training have you completed?

- Clinical Sciences
- Radiology
- Sport
- Pediatrics
- Neurology
- Other (please specify)

## Part 1: Demographic and Practice Characteristics

### \*10. Your practice is best described as:

- Solo practice
- Group practice
- Multidisciplinary setting (with GP, physiotherapist, etc.)
- Other, please specify

## Part 1: Demographic and practice characteristics

# A survey of the attitudes of Dutch chiropractors towards the use of

## \*11. How many chiropractors are working in your practice?

Number of chiropractors including yourself

## Part 2: Use of diagnostic imaging in chiropractic practice

Part 2 exists of four sections. In the following four sections, there are questions about your use of diagnostic imaging in your practice. In this study diagnostic imaging includes x-rays, MRI scans, CT scans and ultrasound scans.

Please press next to go to the first section

## Part 2: Section 1 Requesting existing diagnostic imaging or radiological re...

In the following questions we use the word relevant.

Relevant in this context means:

- the imaging is not older than 5 years
- the imaging gives information about the patients complaint eg. Patient with low back pain has x-rays of his low back and not of a fractured thumb.

## \*12. Approximately what percentage of your NEW patients have already had relevant diagnostic imaging taken by other health-care professionals (e.g. general practitioner, specialist or colleague chiropractor)?

Percentage

## \*13. Do you request the WRITTEN REPORT of the existing (relevant) diagnostic imaging?

- Never
- Sometimes
- Always

## \*14. Do you request the EXISTING (relevant) diagnostic imaging?

- Never
- Sometimes
- Always

## Part 2: Section 1 Requesting existing diagnostic imaging or radiological re...

# A survey of the attitudes of Dutch chiropractors towards the use of

**\*15. Do you request relevant diagnostic imaging and/or written reports from the radiology department?**

|                              | never                 | sometimes             | always                |
|------------------------------|-----------------------|-----------------------|-----------------------|
| Yourself                     | <input type="radio"/> | <input type="radio"/> | <input type="radio"/> |
| Via the patient              | <input type="radio"/> | <input type="radio"/> | <input type="radio"/> |
| Via the general practitioner | <input type="radio"/> | <input type="radio"/> | <input type="radio"/> |

**\*16. What percentage of diagnostic imaging or written reports, that you request, are: (adds up to 100%)**

|                              |                      |
|------------------------------|----------------------|
| % x-rays                     | <input type="text"/> |
| % MRI scans                  | <input type="text"/> |
| % CT scans                   | <input type="text"/> |
| % other e.g. ultrasound scan | <input type="text"/> |

## Part 2: Section 2 Hospital

In this section, there are questions about the hospitals that send the diagnostic imaging to chiropractors.

**\*17. How many hospitals are in the referral area of your practice?**

Number of hospitals

**\*18. From how many of these hospitals, can you get the diagnostic images?**

Number of hospitals

**\*19. What are the reasons of the hospital for NOT sending you the diagnostic imaging (in some cases)?**

|                                                                                      | Yes                   | No                    | I don't know          |
|--------------------------------------------------------------------------------------|-----------------------|-----------------------|-----------------------|
| Patient has to request the diagnostic imaging themselves                             | <input type="radio"/> | <input type="radio"/> | <input type="radio"/> |
| Chiropractors are not qualified to read diagnostic imaging according to the hospital | <input type="radio"/> | <input type="radio"/> | <input type="radio"/> |
| It is too expensive to send them                                                     | <input type="radio"/> | <input type="radio"/> | <input type="radio"/> |

Other (please specify)

**20. Do you or the patient have to pay for the requested images?**

- Yes  
 No

## Part 2: Section 2 Hospital

## A survey of the attitudes of Dutch chiropractors towards the use of

**\*21. How much do you or your patient have to pay the hospital for sending the CD of the diagnostic images to you?**

- Between 0 and 5 Euro
- Between 6 and 10 Euro
- Between 11 and 15 Euro
- Other (please specify)

### Part 2: Section 3 Radiographs

In this section, there are questions about how often diagnostic imaging in chiropractic practice is present or is needed.

**\*22. Of approximately what percentage of your NEW patients would you like to have diagnostic imaging (this includes diagnostic imaging that is already present or referral for diagnostic imaging)?**

Percentage

**\*23. Do you have one of the following x-ray facilities available at (one of the) practice (s)?**

- X-ray machine
- iDXA
- No

### Part 2: Section 3 Radiographs

**\*24. Of approximately what percentage of your NEW patients of whom you would like to have diagnostic imaging, do you take x-rays scan yourself?**

**Example: You would like to have diagnostic imaging in 30% of your new patients. In 50% of these new patients of whom you like to have diagnostic imaging, you take x-rays yourself. Your answer will be 50%.**

Percentage

## A survey of the attitudes of Dutch chiropractors towards the use of

**\*25. Of approximately what percentage of your NEW patients, of whom you like to have diagnostic imaging, do you refer for diagnostic imaging other than x-rays?**

**Example: You would like to have diagnostic imaging in 30% of your new patients. In 5% of these new patients of whom you like to have diagnostic imaging, you refer for diagnostic imaging other than x-rays. Your answer will be 5%.**

Percentage

### Part 2: Section 3 Radiographs

**\*26. Of approximately what percentage of your NEW patients of whom you would like to have diagnostic imaging, do you take iDXA scan yourself?**

**Example: You would like to have diagnostic imaging in 30% of your new patients. In 50% of these new patients of whom you like to have diagnostic imaging, you take iDXA scan yourself. Your answer will be 50%.**

Percentage

**\*27. Of approximately what percentage of your NEW patients, of whom you like to have diagnostic imaging, do you refer for diagnostic imaging other than iDXA scan?**

**Example: You would like to have diagnostic imaging in 30% of your new patients. In 5% of these new patients of whom you like to have diagnostic imaging, you refer for diagnostic imaging other than iDXA scan. Your answer will be 5%.**

Percentage

### Part 2: Section 3 Radiographs

**\*28. Of approximately what percentage of your NEW patients of whom you would like to have diagnostic imaging, do you refer for x-rays?**

**Example: You would like to have diagnostic imaging in 30% of your new patients. In 50% of these new patients of whom you like to have diagnostic imaging, you refer for x-rays yourself. Your answer will be 50%.**

Percentage

## A survey of the attitudes of Dutch chiropractors towards the use of

**\*29. Of approximately what percentage of your NEW patients of whom you would like to have diagnostic imaging, do you refer for diagnostic imaging other than x-rays?**

**Example: You would like to have diagnostic imaging in 30% of your new patients. In 5% of these new patients of whom you like to have diagnostic imaging, you refer for diagnostic imaging other than x-rays yourself. Your answer will be 5%.**

Percentage

### Part 2: Section 4 Reasons to use diagnostic imaging in chiropractic practic...

This section contains questions about the use of diagnostic imaging in making clinical decisions.

**\*30. What are the reasons for using diagnostic imaging and/or a radiological report?**

|                             | Never a reason        | Almost never a reason | Sometimes a reason    | Often a reason        | Always a reason       |
|-----------------------------|-----------------------|-----------------------|-----------------------|-----------------------|-----------------------|
| Diagnosis                   | <input type="radio"/> | <input type="radio"/> | <input type="radio"/> | <input type="radio"/> | <input type="radio"/> |
| Prognosis                   | <input type="radio"/> | <input type="radio"/> | <input type="radio"/> | <input type="radio"/> | <input type="radio"/> |
| Exclude contra-indications  | <input type="radio"/> | <input type="radio"/> | <input type="radio"/> | <input type="radio"/> | <input type="radio"/> |
| Indicate specific therapy   | <input type="radio"/> | <input type="radio"/> | <input type="radio"/> | <input type="radio"/> | <input type="radio"/> |
| Postural Analysis           | <input type="radio"/> | <input type="radio"/> | <input type="radio"/> | <input type="radio"/> | <input type="radio"/> |
| Follow-up/ evaluate changes | <input type="radio"/> | <input type="radio"/> | <input type="radio"/> | <input type="radio"/> | <input type="radio"/> |
| Other (please specify)      | <input type="text"/>  |                       |                       |                       |                       |

### Part 2: Section 4 Reasons to use diagnostic imaging in chiropractic practic...

**\*31. What are your considerations to NOT send the patient for diagnostic imaging?**

|                                      | Never a reason        | Almost never a reason | Sometimes a reason    | Often a reason        | Always a reason       |
|--------------------------------------|-----------------------|-----------------------|-----------------------|-----------------------|-----------------------|
| High radiation load for the patient  | <input type="radio"/> | <input type="radio"/> | <input type="radio"/> | <input type="radio"/> | <input type="radio"/> |
| Limited value of imaging information | <input type="radio"/> | <input type="radio"/> | <input type="radio"/> | <input type="radio"/> | <input type="radio"/> |
| No cooperation of the GP             | <input type="radio"/> | <input type="radio"/> | <input type="radio"/> | <input type="radio"/> | <input type="radio"/> |
| No cooperation of the hospital       | <input type="radio"/> | <input type="radio"/> | <input type="radio"/> | <input type="radio"/> | <input type="radio"/> |
| No cooperation of the patient        | <input type="radio"/> | <input type="radio"/> | <input type="radio"/> | <input type="radio"/> | <input type="radio"/> |
| High costs for the patient           | <input type="radio"/> | <input type="radio"/> | <input type="radio"/> | <input type="radio"/> | <input type="radio"/> |
| Patient is too young                 | <input type="radio"/> | <input type="radio"/> | <input type="radio"/> | <input type="radio"/> | <input type="radio"/> |
| Other (please specify)               | <input type="text"/>  |                       |                       |                       |                       |

### Part 2: Section 4 Reasons to use diagnostic imaging in chiropractic practic...

# A survey of the attitudes of Dutch chiropractors towards the use of

## \*32. What are your considerations to request new diagnostic imaging for patients if recent (< 2 years) diagnostic imaging is present?

|                                                                                                             | Never a reason        | Almost never a reason | Sometimes a reason    | Often a reason        | Always a reason       |
|-------------------------------------------------------------------------------------------------------------|-----------------------|-----------------------|-----------------------|-----------------------|-----------------------|
| Poor quality of the images                                                                                  | <input type="radio"/> | <input type="radio"/> | <input type="radio"/> | <input type="radio"/> | <input type="radio"/> |
| Images not recent enough in patients with specific conditions eg. scoliosis                                 | <input type="radio"/> | <input type="radio"/> | <input type="radio"/> | <input type="radio"/> | <input type="radio"/> |
| Image not taken in a standing position                                                                      | <input type="radio"/> | <input type="radio"/> | <input type="radio"/> | <input type="radio"/> | <input type="radio"/> |
| Wrong series or incomplete series of imaging, eg. an Anterior Posterior Open Mouth view is not taken.       | <input type="radio"/> | <input type="radio"/> | <input type="radio"/> | <input type="radio"/> | <input type="radio"/> |
| Follow-up after several treatments                                                                          | <input type="radio"/> | <input type="radio"/> | <input type="radio"/> | <input type="radio"/> | <input type="radio"/> |
| Obvious change in the patients situation or health since the existing images were taken eg. trauma, disease | <input type="radio"/> | <input type="radio"/> | <input type="radio"/> | <input type="radio"/> | <input type="radio"/> |
| Other (please specify)                                                                                      | <input type="text"/>  |                       |                       |                       |                       |

## Part 3 Opinions

You have finished part 2 of the survey.  
Part 3 will exist of 2 sections.

Please press next to enter part 3 section 1

## Part 3: Section 1 Opinions of chiropractors in the Netherlands on diagnosti...

In this section, there are questions about YOUR opinion on the use of diagnostic imaging in chiropractic practices.

### \*33. It is important that chiropractors use diagnostic imaging in making clinical decisions about their patients.

- agree
- no opinion
- disagree

### \*34. It is important that chiropractors take x-rays themselves in their own practice.

- agree
- no opinion
- disagree

## Part 3: Section 1 Opinions of chiropractors in the Netherlands on diagnosti...



## A survey of the attitudes of Dutch chiropractors towards the use of

### \*35. It is important that chiropractors can directly refer for :

|                                            | Agree                 | No opinion            | Disagree              |
|--------------------------------------------|-----------------------|-----------------------|-----------------------|
| X-rays                                     | <input type="radio"/> | <input type="radio"/> | <input type="radio"/> |
| MRI scans                                  | <input type="radio"/> | <input type="radio"/> | <input type="radio"/> |
| CT scan                                    | <input type="radio"/> | <input type="radio"/> | <input type="radio"/> |
| Other diagnostic imaging<br>eg. Ultrasound | <input type="radio"/> | <input type="radio"/> | <input type="radio"/> |

### \*36. It is important for chiropractors to be able to interpret the following diagnostic imaging themselves:

|                                            | Agree                 | No opinion            | Disagree              |
|--------------------------------------------|-----------------------|-----------------------|-----------------------|
| X-rays                                     | <input type="radio"/> | <input type="radio"/> | <input type="radio"/> |
| MRI scans                                  | <input type="radio"/> | <input type="radio"/> | <input type="radio"/> |
| CT scan                                    | <input type="radio"/> | <input type="radio"/> | <input type="radio"/> |
| Other diagnostic imaging<br>eg. Ultrasound | <input type="radio"/> | <input type="radio"/> | <input type="radio"/> |

## Part 3: Section 2 Reading and knowledge of diagnostic imaging by chiropract...

In this section, the questions are about your ability, knowledge and confidence to read diagnostic imaging.

### \*37. I read ..... myself.

|                                            | Never                 | Sometimes             | Always                |
|--------------------------------------------|-----------------------|-----------------------|-----------------------|
| X-rays                                     | <input type="radio"/> | <input type="radio"/> | <input type="radio"/> |
| MRI scans                                  | <input type="radio"/> | <input type="radio"/> | <input type="radio"/> |
| CT scans                                   | <input type="radio"/> | <input type="radio"/> | <input type="radio"/> |
| Other diagnostic imaging<br>eg. Ultrasound | <input type="radio"/> | <input type="radio"/> | <input type="radio"/> |

### \*38. I feel confident about my ability to read .....

|                                            | Never                 | Sometimes             | Always                |
|--------------------------------------------|-----------------------|-----------------------|-----------------------|
| X-rays                                     | <input type="radio"/> | <input type="radio"/> | <input type="radio"/> |
| MRI scans                                  | <input type="radio"/> | <input type="radio"/> | <input type="radio"/> |
| CT scans                                   | <input type="radio"/> | <input type="radio"/> | <input type="radio"/> |
| Other diagnostic imaging<br>eg. Ultrasound | <input type="radio"/> | <input type="radio"/> | <input type="radio"/> |

## Part 3: Section 2 Reading and knowledge of diagnostic imaging by chiropract...

## A survey of the attitudes of Dutch chiropractors towards the use of

**\*39. Students who graduate from chiropractic college should be able to take x-rays themselves.**

- Yes
- No

**\*40. Students who graduate from chiropractic college should be able to interpret x-rays themselves.**

- Yes
- No

**\*41. Students who graduate from chiropractic college should be able to take MRI scans themselves.**

- Yes
- No

**\*42. Students who graduate from chiropractic college should be able to interpret MRI scans themselves.**

- Yes
- No

**\*43. Students who graduate from chiropractic college should be able to take other diagnostic imaging eg. ultrasound scans themselves.**

- Yes
- No

**\*44. Students who graduate from chiropractic college should be able to interpret other diagnostic imaging eg. ultrasound scans themselves.**

- Yes
- No

**\*45. Every chiropractor should collect 150 points in 5 years in postgraduate training to keep his registration as a chiropractor by the Stichting Chiropractie Nederland (SCN). I believe postgraduate training in radiology (diagnostic imaging) should be mandatory by the Stichting Chiropractie Nederland.**

- agree
- neutral
- disagree

## A survey of the attitudes of Dutch chiropractors towards the use of chiropract...

**\*46. How many of these 150 points needed every five years, should be mandatory by SCN on postgraduate training in radiology (diagnostic imaging)?**

- 0 points
- 1-5 point
- 5-10 points
- 10-15 points
- 15-20 points
- More than 20 points

### Part 4: Practice Guidelines

You have finished part 3 of the survey.  
Please press next to go to part 4.

### Part 4: Practice Guidelines

In this part there are questions about the use of practice guidelines in the management of low back pain patients in your practice.

The following questions are about the GENERAL use of practices guidelines in the management of low back pain patients in your practice.

**\*47. Are you familiar with any practice guidelines in the management of low back pain patients?**

- Yes
- No

### Part 4: Practice Guidelines

## A survey of the attitudes of Dutch chiropractors towards the use of

### \*48. Which practice guideline(s) are you familiar with in the management of your low back pain patients

|                                                                | Yes                   | No                    |
|----------------------------------------------------------------|-----------------------|-----------------------|
| AHCPR                                                          | <input type="radio"/> | <input type="radio"/> |
| Mercy Guideline                                                | <input type="radio"/> | <input type="radio"/> |
| The Council on Chiropractic Guidelines and Practice Parameters | <input type="radio"/> | <input type="radio"/> |
| British Chiropractic Association Guideline                     | <input type="radio"/> | <input type="radio"/> |
| CBO                                                            | <input type="radio"/> | <input type="radio"/> |
| NHG                                                            | <input type="radio"/> | <input type="radio"/> |
| KNGF                                                           | <input type="radio"/> | <input type="radio"/> |
| Nice                                                           | <input type="radio"/> | <input type="radio"/> |
| Guidelines from the NCA                                        | <input type="radio"/> | <input type="radio"/> |

Other (please specify)

### \*49. Do you take the recommendations of these practice guidelines into account in the management of low back pain patients?

- Yes  
 No

## Part 4: Practice Guidelines

### \*50. The recommendations of which practice guidelines do you take into account in the clinical decision making in the management of your low back pain patients? Please tick TWO guidelines you use most often.

- AHCPR  
 Mercy Guideline  
 The Council on Chiropractic Guidelines and Practice Parameters  
 British Chiropractic Association Guideline  
 CBO  
 NHG  
 KNGF  
 Nice  
 Guidelines from the NCA  
 Other (please specify)

## Part 4: Practice Guidelines

# A survey of the attitudes of Dutch chiropractors towards the use of

The following questions are on the SPECIFIC use of practice guidelines in the clinical decision making about DIAGNOSTIC IMAGING in your low back patients.

**\*51. Are you familiar with practice guidelines for sending or requesting diagnostic imaging in low back pain patients?**

- Yes
- No

## Part 4: Practice Guidelines

**\*52. Which practice guideline(s) are you familiar with sending for or requesting diagnostic imaging in your low back patients?**

|                                                                        | Yes                   | No                    |
|------------------------------------------------------------------------|-----------------------|-----------------------|
| Diagnostic imaging guidelines for musculoskeletal complaints in adults | <input type="radio"/> | <input type="radio"/> |
| AHCPR                                                                  | <input type="radio"/> | <input type="radio"/> |
| Mercy Guideline                                                        | <input type="radio"/> | <input type="radio"/> |
| The Council on Chiropractic Guidelines and Practice Parameters         | <input type="radio"/> | <input type="radio"/> |
| British Chiropractic Association Guideline                             | <input type="radio"/> | <input type="radio"/> |
| CBO                                                                    | <input type="radio"/> | <input type="radio"/> |
| NHG                                                                    | <input type="radio"/> | <input type="radio"/> |
| KNGF                                                                   | <input type="radio"/> | <input type="radio"/> |
| Nice                                                                   | <input type="radio"/> | <input type="radio"/> |
| Guidelines from the NCA                                                | <input type="radio"/> | <input type="radio"/> |
| Other (please specify)                                                 |                       |                       |
| <input type="text"/>                                                   |                       |                       |

**\*53. Do you take the recommendations of these practice guidelines into account with sending for or requesting diagnostic imaging in your low back pain patients?**

- Yes
- No

## Part 4: Practice Guidelines

## A survey of the attitudes of Dutch chiropractors towards the use of

**\*54. The recommendations of which practice guidelines do you take into account with sending for or requesting diagnostic imaging in your low back patients? Please tick TWO guidelines you use most often.**

- Diagnostic imaging guidelines for musculoskeletal complaints in adults
- AHCPR
- Mercy Guideline
- The Council on Chiropractic Guidelines and Practice Parameters
- British Chiropractic Association Guideline
- CBO
- NHG
- KNGF
- Nice
- Guidelines from the NCA
- Other (please specify)

### Part 5: Clinical Vignettes

You have finished part 4 of the survey. Part 5 will be clinical vignettes.

This section contains three hypothetical scenarios about patients who present to you with acute low back pain and three about patients with chronic low back pain. In the scenarios we have varied a range of features that might influence your management decisions (with regards to investigations you might order and interventions you might recommend or perform). We are aware that the scenario format means that your skills you may normally draw on, such as evaluating non-verbal cues from the patient and performing a physical examination, cannot be a factor in your assessment. Nevertheless, given this understanding, we hope that you address each scenario and answer the questions as best as you can with the information provided.

Please press next to go to the first vignette.

### Part 5: Clinical Vignette #1

A 28-year old woman has suffered from acute low back pain for a week. She has been unable to do her job managing a hospital cafeteria for this time. While anxious to return to work, she feels immobilized by the pain. There is no history of trauma. The pain is limited to the low back area, without radiation. On physical examination, there is marked limitation of anterior flexion and tenderness in the left paraspinal region. The neurological examination is normal, with normal straight leg raising to 90 degrees.

The following questions are about what you would GENERALLY do with this patient

## A survey of the attitudes of Dutch chiropractors towards the use of

**\*55. Which investigations would you order for this patient at this visit? Please mark all appropriate boxes.**

- Would not order tests
- Lumbopelvic X-ray and/or Sacroiliac X-ray series
- MRI scan
- CT scan
- Other advanced Imaging (eg. Ultrasound scan, Bone scan)
- Lab tests (eg. urinalysis, ESR)
- Surface Electromyography/nerve conduction
- Other (please specify)

**\*56. Which treatments would you offer for this patient at this visit? Please mark all appropriate boxes.**

- No intervention - expectant observation
- Chiropractic adjustment (including SMT, Cox, Activator, Gonstead, Thomsen drop)
- Exercise
- Education (back school)
- Massage
- Other (please specify)
- Spinal traction (not flexion distraction)
- Psychosocial evaluation by chiropractor
- Non-exercise modalities (eg. heat, ice etc.)
- Electrotherapy (eg. TENS, interferential, etc.)

### Part 5: Clinical Vignette #1 continued

A 28-year old woman has suffered from acute low back pain for a week. She has been unable to do her job managing a hospital cafeteria for this time. While anxious to return to work, she feels immobilized by the pain. There is no history of trauma. The pain is limited to the low back area, without radiation. On physical examination, there is marked limitation of anterior flexion and tenderness in the left paraspinal region. The neurological examination is normal, with normal straight leg raising to 90 degrees.

**\*57. In how many days will be the second appointment?**

Days

# A survey of the attitudes of Dutch chiropractors towards the use of

## \*58. Frequency of treatment

**How often will you treat this patient?**

- once a week
- twice a week
- three times a week
- Other (please specify)

**\*59. After how many treatments will you re-evaluate? Re-evaluation means that you monitor the progress not only by asking questions but that you also retest the positive tests found in the physical examination at the first visit.**

Treatments

## Part 5: Clinical Vignette #1 continued

A 28-year old woman has suffered from acute low back pain for a week. She has been unable to do her job managing a hospital cafeteria for this time. While anxious to return to work, she feels immobilized by the pain. There is no history of trauma. The pain is limited to the low back area, without radiation. On physical examination, there is marked limitation of anterior flexion and tenderness in the left paraspinal region. The neurological examination is normal, with normal straight leg raising to 90 degrees.

**\*60. What advice would you give the patient at this visit? Please mark all appropriate boxes.**

- |                                                                                                  |                                                               |
|--------------------------------------------------------------------------------------------------|---------------------------------------------------------------|
| <input type="checkbox"/> No advice                                                               | <input type="checkbox"/> Bedrest                              |
| <input type="checkbox"/> Advice on exercise (home programme)                                     | <input type="checkbox"/> Lumbar support or corset             |
| <input type="checkbox"/> General advice on back care                                             | <input type="checkbox"/> Suggest over the counter Paracetamol |
| <input type="checkbox"/> Advice to attend a work modification programme                          | <input type="checkbox"/> Suggest over the counter NSAIDS      |
| <input type="checkbox"/> Advice to have psychosocial evaluation outside the chiropractors office |                                                               |
| <input type="checkbox"/> Other (please specify)                                                  |                                                               |



# A survey of the attitudes of Dutch chiropractors towards the use of

## \*61. Referral for management outside your office at this visit: Please mark all appropriate boxes.

- |                                                                  |                                                                                                                             |
|------------------------------------------------------------------|-----------------------------------------------------------------------------------------------------------------------------|
| <input type="checkbox"/> Would not refer                         | <input type="checkbox"/> Physiotherapy                                                                                      |
| <input type="checkbox"/> Pain Clinic                             | <input type="checkbox"/> Acupuncture                                                                                        |
| <input type="checkbox"/> Refer for prescription Paracetamol      | <input type="checkbox"/> Refer to clinic specializing in formal programs of active supervised exercise & education for back |
| <input type="checkbox"/> Refer for prescription NSAIDs           | <input type="checkbox"/> Rehabilitation Clinic                                                                              |
| <input type="checkbox"/> Refer for prescription Muscle relaxants | <input type="checkbox"/> General Practitioner                                                                               |
| <input type="checkbox"/> Refer for prescription Opioids          | <input type="checkbox"/> Medical Specialist                                                                                 |
| <input type="checkbox"/> Other Chiropractor                      |                                                                                                                             |
| <input type="checkbox"/> Other (please specify)                  |                                                                                                                             |

## Part 5: Clinical Vignette #1 continued

A 28-year old woman has suffered from acute low back pain for a week. She has been unable to do her job managing a hospital cafeteria for this time. While anxious to return to work, she feels immobilized by the pain. There is no history of trauma. The pain is limited to the low back area, without radiation. On physical examination, there is marked limitation of anterior flexion and tenderness in the left paraspinal region. The neurological examination is normal, with normal straight leg raising to 90 degrees.

## \*62. What kind of medical specialist would you refer?

- Neurologist
- Orthopaedist
- Rheumatologist
- Other (please specify)

## \*63. For what treatment would you refer to a medical specialist?

- Injections (eg. trigger point, facet, epidural)
- Surgery
- Second Opinion
- Other (please specify)

# A survey of the attitudes of Dutch chiropractors towards the use of

## \*64. Hospitalization

**Would you refer the patient for admission to hospital?**

- Definitely
- Probably
- Probably not
- Definitely not

## Part 5: Clinical Vignette #1 continued

A 28-year old woman has suffered from acute low back pain for a week. She has been unable to do her job managing a hospital cafeteria for this time. While anxious to return to work, she feels immobilized by the pain. There is no history of trauma. The pain is limited to the low back area, without radiation. On physical examination, there is marked limitation of anterior flexion and tenderness in the left paraspinal region. The neurological examination is normal, with normal straight leg raising to 90 degrees.

The following questions are about the SPECIFIC advice you will give this patient.

## \*65. Return to work

**The patient described in the vignette asks what your advice would be about her work. Please tick the one response that best describes what you would recommend this patient to do.**

**I would recommend this patient to:**

- Return to normal work
- Return to part time or light duties
- Be off work until pain has improved
- Be off work until pain has completely disappeared
- Be off work for a further..... weeks (please state number of weeks)

## A survey of the attitudes of Dutch chiropractors towards the use of

### \*66. Activity

**The patient described in the vignette asks what your advice would be about activity. Please tick the one response that best describes what you would recommend this patient to do.**

**I would recommend this patient to:**

- Activity Perform usual activities
- Perform activities within the patient's tolerance
- Perform only pain free activities
- Limit all physical activities until pain disappears

### \*67. Bedrest

**The patient described in the vignette asks what your advice would be about bedrest. Please tick the one response that best describes what you would recommend this patient to do.**

**I would recommend this patient to:**

- Avoid resting in bed entirely
- Avoid resting in bed as much as possible
- Rest in bed only when pain is severe
- Rest in bed until pain improves substantially
- Rest in bed until pain disappears

## Part 5: Clinical vignette #1 end

This is the end of vignette #1.  
Please press next to go to clinical vignette #2

## Part 5: Clinical Vignette #2

The woman in Vignette # 1 has now had her symptoms for five weeks. You have managed her during this time and there has been little change in pain and no change in physical findings. Today she continues to have pain with movement, and she has not had the confidence to return to work. On examination today, she still has some limitation in the anterior flexion of the spine with a normal neurological examination.

## A survey of the attitudes of Dutch chiropractors towards the use of

**\*68. Which investigations would you order for this patient at this visit? Please mark all appropriate boxes.**

- Would not order tests
- Lumbopelvic X-ray and/or Sacroiliac X-ray series
- MRI scan
- CT scan
- Other advanced Imaging (eg. Ultrasound scan, Bone scan)
- Lab tests (eg. urinalysis, ESR)
- Surface Electromyography/nerve conduction
- Other (please specify)

**\*69. Which treatments would you offer for this patient at this visit? Please mark all appropriate boxes.**

- No intervention - expectant observation
- Spinal traction (not flexion distraction)
- Chiropractic adjustment (including SMT, Cox, Activator, Gonstead, Thomsen drop)
- Psychosocial evaluation by chiropractor
- Exercise
- Non-exercise modalities (eg. heat, ice etc.)
- Education (back school)
- Electrotherapy (eg. TENS, interferential, etc.)
- Massage
- Other (please specify)

### Part 5: Clinical Vignette #2 continued

The woman in Vignette # 1 has now had her symptoms for five weeks. You have managed her during this time and there has been little change in pain and no change in physical findings. Today she continues to have pain with movement, and she has not had the confidence to return to work. On examination today, she still has some limitation in the anterior flexion of the spine with a normal neurological examination.

**\*70. In how many days will be the next appointment?**

Days

# A survey of the attitudes of Dutch chiropractors towards the use of

## \*71. Frequency of treatment

### How often will you treat this patient?

- once a week
- twice a week
- three times a week
- Other (please specify)

### \*72. After how many treatments will you re-evaluate? Re-evaluation means that you monitor the progress not only by asking questions but that you also retest the positive tests found in the physical examination at the first visit.

Treatments

## Part 5: Clinical Vignette #2 continued

The woman in Vignette # 1 has now had her symptoms for five weeks. You have managed her during this time and there has been little change in pain and no change in physical findings. Today she continues to have pain with movement, and she has not had the confidence to return to work. On examination today, she still has some limitation in the anterior flexion of the spine with a normal neurological examination.

### \*73. What advice would you give the patient at this visit? Please mark all appropriate boxes.

- |                                                                                                  |                                                               |
|--------------------------------------------------------------------------------------------------|---------------------------------------------------------------|
| <input type="checkbox"/> No advice                                                               | <input type="checkbox"/> Bedrest                              |
| <input type="checkbox"/> Advice on exercise (home programme)                                     | <input type="checkbox"/> Lumbar support or corset             |
| <input type="checkbox"/> General advice on back care                                             | <input type="checkbox"/> Suggest over the counter Paracetamol |
| <input type="checkbox"/> Advice to attend a work modification programme                          | <input type="checkbox"/> Suggest over the counter NSAIDS      |
| <input type="checkbox"/> Advice to have psychosocial evaluation outside the chiropractors office |                                                               |
| <input type="checkbox"/> Other (please specify)                                                  |                                                               |

# A survey of the attitudes of Dutch chiropractors towards the use of

## \*74. Referral for management outside your office at this visit: Please mark all appropriate boxes.

- |                                                 |                                                                                                                             |
|-------------------------------------------------|-----------------------------------------------------------------------------------------------------------------------------|
| <input type="checkbox"/> Would not refer        | <input type="checkbox"/> Refer to clinic specializing in formal programs of active supervised exercise & education for back |
| <input type="checkbox"/> Medical Specialist     | <input type="checkbox"/> Rehabilitation Clinic                                                                              |
| <input type="checkbox"/> General Practitioner   | <input type="checkbox"/> Refer for prescription Paracetamol                                                                 |
| <input type="checkbox"/> Pain Clinic            | <input type="checkbox"/> Refer for prescription NSAIDs                                                                      |
| <input type="checkbox"/> Other Chiropractor     | <input type="checkbox"/> Refer for prescription Muscle relaxants                                                            |
| <input type="checkbox"/> Physiotherapy          | <input type="checkbox"/> Refer for prescription Opioids                                                                     |
| <input type="checkbox"/> Acupuncture            |                                                                                                                             |
| <input type="checkbox"/> Other (please specify) |                                                                                                                             |

## Part 5: Clinical Vignette #2 continued

The woman in Vignette # 1 has now had her symptoms for five weeks. You have managed her during this time and there has been little change in pain and no change in physical findings. Today she continues to have pain with movement, and she has not had the confidence to return to work. On examination today, she still has some limitation in the anterior flexion of the spine with a normal neurological examination.

## \*75. What kind of medical specialist would you refer?

- Neurologist
- Orthopaedist
- Rheumatologist
- Other (please specify)

## \*76. For what treatment would you refer to a medical specialist?

- Injections (eg. trigger point, facet, epidural)
- Surgery
- Second Opinion
- Other (please specify)

# A survey of the attitudes of Dutch chiropractors towards the use of

## \*77. Hospitalization

**Would you refer the patient for admission to hospital?**

- Definitely
- Probably
- Probably not
- Definitely not

## Part 5: Clinical Vignette #2 continued

The woman in Vignette # 1 has now had her symptoms for five weeks. You have managed her during this time and there has been little change in pain and no change in physical findings. Today she continues to have pain with movement, and she has not had the confidence to return to work. On examination today, she still has some limitation in the anterior flexion of the spine with a normal neurological examination.

The following questions are about the SPECIFIC advice you will give this patient.

## \*78. Return to work

**The patient described in the vignette asks what your advice would be about her work. Please tick the one response that best describes what you would recommend this patient to do.**

**I would recommend this patient to:**

- Return to normal work
- Return to part time or light duties
- Be off work until pain has improved
- Be off work until pain has completely disappeared
- Be off work for a further..... weeks (please state number of weeks)

## \*79. Activity

**The patient described in the vignette asks what your advice would be about activity. Please tick the one response that best describes what you would recommend this patient to do.**

**I would recommend this patient to:**

- Activity Perform usual activities
- Perform activities within the patient's tolerance
- Perform only pain free activities
- Limit all physical activities until pain disappears

## A survey of the attitudes of Dutch chiropractors towards the use of

### \* 80. Bedrest

**The patient described in the vignette asks what your advice would be about bedrest. Please tick the one response that best describes what you would recommend this patient to do.**

**I would recommend this patient to:**

- Avoid resting in bed entirely
- Avoid resting in bed as much as possible
- Rest in bed only when pain is severe
- Rest in bed until pain improves substantially
- Rest in bed until pain disappears

### Part 5: Clinical Vignette #2 continued

The woman in Vignette # 1 has now had her symptoms for five weeks. You have managed her during this time and there has been little change in pain and no change in physical findings. Today she continues to have pain with movement, and she has not had the confidence to return to work. On examination today, she still has some limitation in the anterior flexion of the spine with a normal neurological examination.

### \* 81. Clinical Vignette # 2 (continued)

**If this patient also reported weight loss and pain at rest five weeks after the first treatment, what (if any) additional investigations, treatments or referral would you order, refer for or recommend?**

### Part 5: Clinical vignette #2 End

This is the end of vignette #2.  
Please press next to go to clinical vignette #3

### Part 5: Clinical Vignette #3 continued

A 35-year old auto mechanic presents with a 4 day history of severe acute low back pain with unilateral radiation to the anterior medial leg and the dorsal surface of the foot. The pain started when he was twisting at work but there was no history of trauma. He has some sensory deficit in this distribution and a diminished patella reflex but no motor weakness. Straight leg raising is limited to 45 degrees in the affected leg.

The following questions are about what you would GENERALLY do with this patient



## A survey of the attitudes of Dutch chiropractors towards the use of

**\*82. Which investigations would you order for this patient at this visit? Please mark all appropriate boxes.**

- Would not order tests
- Lumbopelvic X-ray and/or Sacroiliac X-ray series
- MRI scan
- CT scan
- Other advanced Imaging (eg. Ultrasound scan, Bone scan)
- Lab tests (eg. urinalysis, ESR)
- Surface Electromyography/nerve conduction
- Other (please specify)

**\*83. Which treatments would you offer for this patient at this visit? Please mark all appropriate boxes.**

- No intervention - expectant observation
- Chiropractic adjustment (including SMT, Cox, Activator, Gonstead, Thomsen drop)
- Exercise
- Education (back school)
- Massage
- Other (please specify)
- Spinal traction (not flexion distraction)
- Psychosocial evaluation by chiropractor
- Non-exercise modalities (eg. heat, ice etc.)
- Electrotherapy (eg. TENS, interferential, etc.)

### Part 5: Clinical Vignette #3 contined

A 35-year old auto mechanic presents with a 4 day history of severe acute low back pain with unilateral radiation to the anterior medial leg and the dorsal surface of the foot. The pain started when he was twisting at work but there was no history of trauma. He has some sensory deficit in this distribution and a diminished patella reflex but no motor weakness. Straight leg raising is limited to 45 degrees in the affected leg.

**\*84. In how many days will be the second appointment?**

Days

# A survey of the attitudes of Dutch chiropractors towards the use of

## \*85. Frequency of treatment

### How often will you treat this patient?

- once a week
- twice a week
- three times a week
- Other (please specify)

### \*86. After how many treatments will you re-evaluate? Re-evaluation means that you monitor the progress not only by asking questions but that you also retest the positive tests found in the physical examination at the first visit.

Number of treatments

## Part 5: Clinical Vignette #3 continued

A 35-year old auto mechanic presents with a 4 day history of severe acute low back pain with unilateral radiation to the anterior medial leg and the dorsal surface of the foot. The pain started when he was twisting at work but there was no history of trauma. He has some sensory deficit in this distribution and a diminished patella reflex but no motor weakness. Straight leg raising is limited to 45 degrees in the affected leg.

### \*87. What advice would you give the patient at this visit? Please mark all appropriate boxes.

- |                                                                                                  |                                                               |
|--------------------------------------------------------------------------------------------------|---------------------------------------------------------------|
| <input type="checkbox"/> No advice                                                               | <input type="checkbox"/> Bedrest                              |
| <input type="checkbox"/> Advice on exercise (home programme)                                     | <input type="checkbox"/> Lumbar support or corset             |
| <input type="checkbox"/> General advice on back care                                             | <input type="checkbox"/> Suggest over the counter Paracetamol |
| <input type="checkbox"/> Advice to attend a work modification programme                          | <input type="checkbox"/> Suggest over the counter NSAIDS      |
| <input type="checkbox"/> Advice to have psychosocial evaluation outside the chiropractors office |                                                               |
| <input type="checkbox"/> Other (please specify)                                                  |                                                               |

# A survey of the attitudes of Dutch chiropractors towards the use of

## \*88. Referral for management outside your office at this visit: Please mark all appropriate boxes.

- |                                                 |                                                                                                                             |
|-------------------------------------------------|-----------------------------------------------------------------------------------------------------------------------------|
| <input type="checkbox"/> Would not refer        | <input type="checkbox"/> Refer to clinic specializing in formal programs of active supervised exercise & education for back |
| <input type="checkbox"/> Medical Specialist     | <input type="checkbox"/> Rehabilitation Clinic                                                                              |
| <input type="checkbox"/> General Practitioner   | <input type="checkbox"/> Refer for prescription Paracetamol                                                                 |
| <input type="checkbox"/> Pain Clinic            | <input type="checkbox"/> Refer for prescription NSAIDs                                                                      |
| <input type="checkbox"/> Other Chiropractor     | <input type="checkbox"/> Refer for prescription Muscle relaxants                                                            |
| <input type="checkbox"/> Physiotherapy          | <input type="checkbox"/> Refer for prescription Opioids                                                                     |
| <input type="checkbox"/> Acupuncture            |                                                                                                                             |
| <input type="checkbox"/> Other (please specify) |                                                                                                                             |

## Part 5: Clinical Vignette #3 continued

A 35-year old auto mechanic presents with a 4 day history of severe acute low back pain with unilateral radiation to the anterior medial leg and the dorsal surface of the foot. The pain started when he was twisting at work but there was no history of trauma. He has some sensory deficit in this distribution and a diminished patella reflex but no motor weakness. Straight leg raising is limited to 45 degrees in the affected leg.

## \*89. What kind of medical specialist would you refer?

- Neurologist
- Orthopaedist
- Rheumatologist
- Other (please specify)

## \*90. For what treatment would you refer to a medical specialist?

- Injections (eg. trigger point, facet, epidural)
- Surgery
- Second Opinion
- Other (please specify)

# A survey of the attitudes of Dutch chiropractors towards the use of

## \*91. Hospitalization

**Would you refer the patient for admission to hospital?**

- Definitely
- Probably
- Probably not
- Definitely not

## Part 5: Clinical Vignette #3 continued

A 35-year old auto mechanic presents with a 4 day history of severe acute low back pain with unilateral radiation to the anterior medial leg and the dorsal surface of the foot. The pain started when he was twisting at work but there was no history of trauma. He has some sensory deficit in this distribution and a diminished patella reflex but no motor weakness. Straight leg raising is limited to 45 degrees in the affected leg.

The following questions are about the SPECIFIC advice you will give this patient.

## \*92. Return to work

**The patient described in the vignette asks what your advice would be about her work. Please tick the one response that best describes what you would recommend this patient to do.**

**I would recommend this patient to:**

- Return to normal work
- Return to part time or light duties
- Be off work until pain has improved
- Be off work until pain has completely disappeared
- Be off work for a further..... weeks (please state number of weeks)

## \*93. Activity

**The patient described in the vignette asks what your advice would be about activity. Please tick the one response that best describes what you would recommend this patient to do.**

**I would recommend this patient to:**

- Activity Perform usual activities
- Perform activities within the patient's tolerance
- Perform only pain free activities
- Limit all physical activities until pain disappears

## A survey of the attitudes of Dutch chiropractors towards the use of

### \*94. Bedrest

**The patient described in the vignette asks what your advice would be about bedrest. Please tick the one response that best describes what you would recommend this patient to do.**

**I would recommend this patient to:**

- Avoid resting in bed entirely
- Avoid resting in bed as much as possible
- Rest in bed only when pain is severe
- Rest in bed until pain improves substantially
- Rest in bed until pain disappears

### Part 5: Clinical Vignette #3 continued

A 35-year old auto mechanic presents with a 4 day history of severe acute low back pain with unilateral radiation to the anterior medial leg and the dorsal surface of the foot. The pain started when he was twisting at work but there was no history of trauma. He has some sensory deficit in this distribution and a diminished patella reflex but no motor weakness. Straight leg raising is limited to 45 degrees in the affected leg.

### \*95. Clinical Vignette # 3 (continued)

**The patient's symptoms and physical examination have NOT improved after you have managed him four weeks. What (if any) additional investigations, treatments or referral would you order, refer for or recommend?**

### Part 5: Clinical vignette #3 End

This is the end of vignette #3.  
Now three chronic patients will be presented to you  
Please press next to go to clinical vignette #4.

### Part 5: Clinical Vignette #4

A 57 year old office worker sees you for low-back pain. She says her pain began 6 months ago. There was no specific incident that caused the pain. The pain is located in the lower back region, with no radiation. The pain is described as an ache (4 out of 10), with occasional sharp "twinges" with certain movements. The pain is relieved by heat and a massage from her spouse. She has no previous history of low-back pain. The patient is overweight (BMI 30), has mild hypertension, and a family history of type 2 diabetes. The patient rarely does any exercise. On physical examination, there is marked limitation in anterior flexion, extension and rotation and there is tenderness in the paraspinal region on both sides. The neurological examination is normal, with normal straight leg raising to 90 degrees. During the consultation she indicates to you that she is anxious that she may have a serious disease. The

## A survey of the attitudes of Dutch chiropractors towards the use of

patient says "a friend had low-back pain like this and she had an x-ray and it showed that she really had something seriously wrong with her".

The following questions are about what you would GENERALLY do with this patient

### \*96. Which investigations would you order for this patient at this visit? Please mark all appropriate boxes.

- Would not order tests
- Lumbopelvic X-ray and/or Sacroiliac X-ray series
- MRI scan
- CT scan
- Other advanced Imaging (eg. Ultrasound scan, Bone scan)
- Lab tests (eg. urinalysis, ESR)
- Surface Electromyography/nerve conduction
- Other (please specify)

### \*97. Which treatments would you offer for this patient at this visit? Please mark all appropriate boxes.

- No intervention - expectant observation
- Chiropractic adjustment (including SMT, Cox, Activator, Gonstead, Thomsen drop)
- Exercise
- Education (back school)
- Massage
- Other (please specify)
- Spinal traction (not flexion distraction)
- Psychosocial evaluation by chiropractor
- Non-exercise modalities (eg. heat, ice etc.)
- Electrotherapy (eg. TENS, interferential, etc.)

## Part 5: Clinical Vignette #4 continued

A 57 year old office worker sees you for low-back pain. She says her pain began 6 months ago. There was no specific incident that caused the pain. The pain is located in the lower back region, with no radiation. The pain is described as an ache (4 out of 10), with occasional sharp "twinges" with certain movements. The pain is relieved by heat and a massage from her spouse. She has no history of low-back pain. The patient is overweight (BMI 30), has mild hypertension, and a family history of type 2 diabetes. The patient rarely does any exercise. On physical examination, there is marked limitation in anterior flexion, extension and rotation and there is tenderness in the paraspinal region on both sides. The neurological examination is normal, with normal straight leg raising to 90 degrees. During the consultation she indicates to you that she is anxious that she may have a serious disease. The patient says "a friend had low-back pain like this and she had an x-ray and it showed that she really had something seriously wrong with her". She repeatedly requests an x-ray during the consultation.

## A survey of the attitudes of Dutch chiropractors towards the use of

### \*98. In how many days will be the second appointment?

Days

### \*99. Frequency of treatment

#### How often will you treat this patient?

- once a week
- twice a week
- three times a week
- Other (please specify)

### 100. After how many treatments will you re-evaluate? Re-evaluation means that you monitor the progress not only by asking questions but that you also retest the positive tests found in the physical examination at the first visit.

Number of treatments

## Part 5: Clinical Vignette #4 continued

A 57 year old office worker sees you for low-back pain. She says her pain began 6 months ago. There was no specific incident that caused the pain. The pain is located in the lower back region, with no radiation. The pain is described as an ache (4 out of 10), with occasional sharp "twinges" with certain movements. The pain is relieved by heat and a massage from her spouse. She has no history of low-back pain. The patient is overweight (BMI 30), has mild hypertension, and a family history of type 2 diabetes. The patient rarely does any exercise. On physical examination, there is marked limitation in anterior flexion, extension and rotation and there is tenderness in the paraspinal region on both sides. The neurological examination is normal, with normal straight leg raising to 90 degrees. During the consultation she indicates to you that she is anxious that she may have a serious disease. The patient says "a friend had low-back pain like this and she had an x-ray and it showed that she really had something seriously wrong with her". She repeatedly requests an x-ray during the consultation.

### \*101. What advice would you give the patient at this visit? Please mark all appropriate boxes.

- |                                                                                                  |                                                               |
|--------------------------------------------------------------------------------------------------|---------------------------------------------------------------|
| <input type="checkbox"/> No advice                                                               | <input type="checkbox"/> Bedrest                              |
| <input type="checkbox"/> Advice on exercise (home programme)                                     | <input type="checkbox"/> Lumbar support or corset             |
| <input type="checkbox"/> General advice on back care                                             | <input type="checkbox"/> Suggest over the counter Paracetamol |
| <input type="checkbox"/> Advice to attend a work modification programme                          | <input type="checkbox"/> Suggest over the counter NSAIDS      |
| <input type="checkbox"/> Advice to have psychosocial evaluation outside the chiropractors office |                                                               |
| <input type="checkbox"/> Other (please specify)                                                  |                                                               |

# A survey of the attitudes of Dutch chiropractors towards the use of

## \*102. Referral for management outside your office at this visit: Please mark all appropriate boxes.

- |                                                 |                                                                                                                             |
|-------------------------------------------------|-----------------------------------------------------------------------------------------------------------------------------|
| <input type="checkbox"/> Would not refer        | <input type="checkbox"/> Refer to clinic specializing in formal programs of active supervised exercise & education for back |
| <input type="checkbox"/> Medical Specialist     | <input type="checkbox"/> Rehabilitation Clinic                                                                              |
| <input type="checkbox"/> General Practitioner   | <input type="checkbox"/> Refer for prescription Paracetamol                                                                 |
| <input type="checkbox"/> Pain Clinic            | <input type="checkbox"/> Refer for prescription NSAIDs                                                                      |
| <input type="checkbox"/> Other Chiropractor     | <input type="checkbox"/> Refer for prescription Muscle relaxants                                                            |
| <input type="checkbox"/> Physiotherapy          | <input type="checkbox"/> Refer for prescription Opioids                                                                     |
| <input type="checkbox"/> Acupuncture            |                                                                                                                             |
| <input type="checkbox"/> Other (please specify) |                                                                                                                             |

## Part 5: Clinical Vignette #4 continued

A 57 year old office worker sees you for low-back pain. She says her pain began 6 months ago. There was no specific incident that caused the pain. The pain is located in the lower back region, with no radiation. The pain is described as an ache (4 out of 10), with occasional sharp "twinges" with certain movements. The pain is relieved by heat and a massage from her spouse. She has no history of low-back pain. The patient is overweight (BMI 30), has mild hypertension, and a family history of type 2 diabetes. The patient rarely does any exercise. On physical examination, there is marked limitation in anterior flexion, extension and rotation and there is tenderness in the paraspinal region on both sides. The neurological examination is normal, with normal straight leg raising to 90 degrees. During the consultation she indicates to you that she is anxious that she may have a serious disease. The patient says "a friend had low-back pain like this and she had an x-ray and it showed that she really had something seriously wrong with her". She repeatedly requests an x-ray during the consultation.

## \*103. What kind of medical specialist would you refer?

- Neurologist
- Orthopaedist
- Rheumatologist
- Other (please specify)

## \*104. For what treatment would you refer to a medical specialist?

- Injections (eg. trigger point, facet, epidural)
- Surgery
- Second Opinion
- Other (please specify)



# A survey of the attitudes of Dutch chiropractors towards the use of

## \*105. Hospitalization

**Would you refer the patient for admission to hospital?**

- Definitely
- Probably
- Probably not
- Definitely not

## Part 5: Clinical Vignette #4 continued

A 57 year old office worker sees you for low-back pain. She says her pain began 6 months ago. There was no specific incident that caused the pain. The pain is located in the lower back region, with no radiation. The pain is described as an ache (4 out of 10), with occasional sharp "twinges" with certain movements. The pain is relieved by heat and a massage from her spouse. She has no history of low-back pain. The patient is overweight (BMI 30), has mild hypertension, and a family history of type 2 diabetes. The patient rarely does any exercise. On physical examination, there is marked limitation in anterior flexion, extension and rotation and there is tenderness in the paraspinal region on both sides. The neurological examination is normal, with normal straight leg raising to 90 degrees. During the consultation she indicates to you that she is anxious that she may have a serious disease. The patient says "a friend had low-back pain like this and she had an x-ray and it showed that she really had something seriously wrong with her". She repeatedly requests an x-ray during the consultation.

The following questions are about the SPECIFIC advice you will give this patient.

## \*106. Return to work

**The patient described in the vignette asks what your advice would be about her work. Please tick the one response that best describes what you would recommend this patient to do.**

**I would recommend this patient to:**

- Return to normal work
- Return to part time or light duties
- Be off work until pain has improved
- Be off work until pain has completely disappeared
- Be off work for a further..... weeks (please state number of weeks)

## A survey of the attitudes of Dutch chiropractors towards the use of

### \*107. Activity

**The patient described in the vignette asks what your advice would be about activity. Please tick the one response that best describes what you would recommend this patient to do.**

**I would recommend this patient to:**

- Activity Perform usual activities
- Perform activities within the patient's tolerance
- Perform only pain free activities
- Limit all physical activities until pain disappears

### \*108. Bedrest

**The patient described in the vignette asks what your advice would be about bedrest. Please tick the one response that best describes what you would recommend this patient to do.**

**I would recommend this patient to:**

- Avoid resting in bed entirely
- Avoid resting in bed as much as possible
- Rest in bed only when pain is severe
- Rest in bed until pain improves substantially
- Rest in bed until pain disappears

## Part 5: Clinical vignette #4 End

This is the end of vignette #4.  
Please press next to go to clinical vignette #5.

## Part 5: Clinical Vignette #5

You have managed the woman in Vignette # 4 for five weeks. During this time there has been little change in pain. On examination today, she still has some limitation in the anterior flexion, extension and rotation of the spine with a normal neurological examination.

The following questions are about what you would GENERALLY do with this patient

## A survey of the attitudes of Dutch chiropractors towards the use of

**\*109. Which investigations would you order for this patient at this visit? Please mark all appropriate boxes.**

- Would not order tests
- Lumbopelvic X-ray and/or Sacroiliac X-ray series
- MRI scan
- CT scan
- Other advanced Imaging (eg. Ultrasound scan, Bone scan)
- Lab tests (eg. urinalysis, ESR)
- Surface Electromyography/nerve conduction
- Other (please specify)

**\*110. Which treatments would you offer for this patient at this visit? Please mark all appropriate boxes.**

- No intervention - expectant observation
- Spinal traction (not flexion distraction)
- Chiropractic adjustment (including SMT, Cox, Activator, Gonstead, Thomsen drop)
- Psychosocial evaluation by chiropractor
- Exercise
- Non-exercise modalities (eg. heat, ice etc.)
- Education (back school)
- Electrotherapy (eg. TENS, interferential, etc.)
- Massage
- Other (please specify)

### Part 5: Clinical Vignette #5 continued

You have managed the woman in Vignette # 4 for five weeks. During this time there has been little change in pain. On examination today, she still has some limitation in the anterior flexion, extension and rotation of the spine with a normal neurological examination.

**\*111. In how many days will be the next appointment?**

Days

# A survey of the attitudes of Dutch chiropractors towards the use of

## \*112. Frequency of treatment

**How often will you treat this patient?**

- once a week
- twice a week
- three times a week
- Other (please specify)

**\*113. After how many treatments will you re-evaluate? Re-evaluation means that you monitor the progress not only by asking questions but that you also retest the positive tests found in the physical examination at the first visit.**

Number of treatments

## Part 5: Clinical Vignette #5 continued

You have managed the woman in Vignette #4 for five weeks. During this time there has been little change in pain. On examination today, she still has some limitation in the anterior flexion, extension and rotation of the spine with a normal neurological examination.

**\*114. What advice would you give the patient at this visit? Please mark all appropriate boxes.**

- |                                                                                                  |                                                               |
|--------------------------------------------------------------------------------------------------|---------------------------------------------------------------|
| <input type="checkbox"/> No advice                                                               | <input type="checkbox"/> Bedrest                              |
| <input type="checkbox"/> Advice on exercise (home programme)                                     | <input type="checkbox"/> Lumbar support or corset             |
| <input type="checkbox"/> General advice on back care                                             | <input type="checkbox"/> Suggest over the counter Paracetamol |
| <input type="checkbox"/> Advice to attend a work modification programme                          | <input type="checkbox"/> Suggest over the counter NSAIDS      |
| <input type="checkbox"/> Advice to have psychosocial evaluation outside the chiropractors office |                                                               |
| <input type="checkbox"/> Other (please specify)                                                  |                                                               |

# A survey of the attitudes of Dutch chiropractors towards the use of

## \*115. Referral for management outside your office at this visit: Please mark all appropriate boxes.

- |                                                 |                                                                                                                             |
|-------------------------------------------------|-----------------------------------------------------------------------------------------------------------------------------|
| <input type="checkbox"/> Would not refer        | <input type="checkbox"/> Refer to clinic specializing in formal programs of active supervised exercise & education for back |
| <input type="checkbox"/> Medical Specialist     | <input type="checkbox"/> Rehabilitation Clinic                                                                              |
| <input type="checkbox"/> General Practitioner   | <input type="checkbox"/> Refer for prescription Paracetamol                                                                 |
| <input type="checkbox"/> Pain Clinic            | <input type="checkbox"/> Refer for prescription NSAIDs                                                                      |
| <input type="checkbox"/> Other Chiropractor     | <input type="checkbox"/> Refer for prescription Muscle relaxants                                                            |
| <input type="checkbox"/> Physiotherapy          | <input type="checkbox"/> Refer for prescription Opioids                                                                     |
| <input type="checkbox"/> Acupuncture            |                                                                                                                             |
| <input type="checkbox"/> Other (please specify) |                                                                                                                             |

## Part 5: Clinical Vignette #5 continued

You have managed the woman in Vignette # 4 for five weeks. During this time there has been little change in pain. On examination today, she still has some limitation in the anterior flexion, extension and rotation of the spine with a normal neurological examination.

## \*116. What kind of medical specialist would you refer?

- Neurologist
- Orthopaedist
- Rheumatologist
- Other (please specify)

## \*117. For what treatment would you refer to a medical specialist?

- Injections (eg. trigger point, facet, epidural)
- Surgery
- Second Opinion
- Other (please specify)

# A survey of the attitudes of Dutch chiropractors towards the use of

## 118. Hospitalization

**Would you refer the patient for admission to hospital?**

- Definitely
- Probably
- Probably not
- Definitely not

## Part 5: Clinical Vignette #5 continued

You have managed the woman in Vignette # 4 for five weeks. During this time there has been little change in pain. On examination today, she still has some limitation in the anterior flexion, extension and rotation of the spine with a normal neurological examination.

The following questions are about the SPECIFIC advice you will give this patient.

### \*119. Return to work

**The patient described in the vignette asks what your advice would be about her work. Please tick the one response that best describes what you would recommend this patient to do).**

- Return to normal work
- Return to part time or light duties
- Be off work until pain has improved
- Be off work until pain has completely disappeared
- Be off work for a further..... weeks (please state number of weeks)

### \*120. Activity

**The patient described in the vignette asks what your advice would be about activity. Please tick the one response that best describes what you would recommend this patient to do.**

**I would recommend this patient to:**

- Activity Perform usual activities
- Perform activities within the patient's tolerance
- Perform only pain free activities
- Limit all physical activities until pain disappears

## A survey of the attitudes of Dutch chiropractors towards the use of

### \*121. Bedrest

**The patient described in the vignette asks what your advice would be about bedrest. Please tick the one response that best describes what you would recommend this patient to do.**

**I would recommend this patient to:**

- Avoid resting in bed entirely
- Avoid resting in bed as much as possible
- Rest in bed only when pain is severe
- Rest in bed until pain improves substantially
- Rest in bed until pain disappears

### Part 5: Clinical vignette #5 End

This is the end of vignette #5.  
Please press next to go to clinical vignette #6.

### Part 5: Clinical Vignette #6

A 50-year old real estate agent consults you for his low-back pain with radiation to the left leg especially the posterior calf and lateral foot. The pain has been present for 12 weeks, starting two days after a weekend of heavy work in the garden. Today he describes the pain as a sharp pain (5 to 6 out of 10). He has had previous, similar episodes of low-back pain with radiation to the leg that have lasted one to two weeks. He has no other health concerns. On physical examination, he has some sensory deficit in the posterior calf and lateral foot and a diminished ankle reflex but no motor weakness. Straight leg raising is limited to 45 degrees in the affected leg.

The following questions are about what you would GENERALLY do with this patient

**\*122. Which investigations would you order for this patient at this visit? Please mark all appropriate boxes.**

- Would not order tests
- Lumbopelvic X-ray and/or Sacroiliac X-ray series
- MRI scan
- CT scan
- Other advanced Imaging (eg. Ultrasound scan, Bone scan)
- Lab tests (eg. urinalysis, ESR)
- Surface Electromyography/nerve conduction
- Other (please specify)

## A survey of the attitudes of Dutch chiropractors towards the use of

**\*123. Which treatments would you offer for this patient at this visit? Please mark all appropriate boxes.**

- |                                                                                                          |                                                                          |
|----------------------------------------------------------------------------------------------------------|--------------------------------------------------------------------------|
| <input type="checkbox"/> No intervention - expectant observation                                         | <input type="checkbox"/> Spinal traction (not flexion distraction)       |
| <input type="checkbox"/> Chiropractic adjustment (including SMT, Cox, Activator, Gonstead, Thomsen drop) | <input type="checkbox"/> Psychosocial evaluation by chiropractor         |
| <input type="checkbox"/> Exercise                                                                        | <input type="checkbox"/> Non-exercise modalities (eg. heat, ice etc.)    |
| <input type="checkbox"/> Education (back school)                                                         | <input type="checkbox"/> Electrotherapy (eg. TENS, interferential, etc.) |
| <input type="checkbox"/> Massage                                                                         |                                                                          |
| <input type="checkbox"/> Other (please specify)                                                          |                                                                          |

### Part 5: Clinical Vignette #6 continued

A 50-year old real estate agent consults you for his low-back pain with radiation to the left leg especially the posterior calf and lateral foot. The pain has been present for 12 weeks, starting two days after a weekend of heavy work in the garden. Today he describes the pain as a sharp pain (5 to 6 out of 10). He has had previous, similar episodes of low-back pain with radiation to the leg that have lasted one to two weeks. He has no other health concerns. On physical examination, he has some sensory deficit in the posterior calf and lateral foot and a diminished ankle reflex but no motor weakness. Straight leg raising is limited to 45 degrees in the affected leg.

**\*124. In how many days will be the second appointment?**

Days

**\*125. Frequency of treatment**

**How often will you treat this patient?**

- once a week
- twice a week
- three times a week
- Other (please specify)

**\*126. After how many treatments will you re-evaluate? Re-evaluation means that you monitor the progress not only by asking questions but that you also retest the positive tests found in the physical examination at the first visit.**

Number of treatments

### Part 5: Clinical Vignette #6 continued

A 50-year old real estate agent consults you for his low-back pain with radiation to the left leg especially the posterior



## A survey of the attitudes of Dutch chiropractors towards the use of

calf and lateral foot. The pain has been present for 12 weeks, starting two days after a weekend of heavy work in the garden. Today he describes the pain as a sharp pain (5 to 6 out of 10). He has had previous, similar episodes of low-back pain with radiation to the leg that have lasted one to two weeks. He has no other health concerns. On physical examination, he has some sensory deficit in the posterior calf and lateral foot and a diminished ankle reflex but no motor weakness. Straight leg raising is limited to 45 degrees in the affected leg.

### \*127. What advice would you give the patient at this visit? Please mark all appropriate boxes.

- |                                                                                                  |                                                               |
|--------------------------------------------------------------------------------------------------|---------------------------------------------------------------|
| <input type="checkbox"/> No advice                                                               | <input type="checkbox"/> Bedrest                              |
| <input type="checkbox"/> Advice on exercise (home programme)                                     | <input type="checkbox"/> Lumbar support or corset             |
| <input type="checkbox"/> General advice on back care                                             | <input type="checkbox"/> Suggest over the counter Paracetamol |
| <input type="checkbox"/> Advice to attend a work modification programme                          | <input type="checkbox"/> Suggest over the counter NSAIDS      |
| <input type="checkbox"/> Advice to have psychosocial evaluation outside the chiropractors office |                                                               |
| <input type="checkbox"/> Other (please specify)                                                  |                                                               |

### \*128. Referral for management outside your office at this visit: Please mark all appropriate boxes.

- |                                                                                                                             |                                                                  |
|-----------------------------------------------------------------------------------------------------------------------------|------------------------------------------------------------------|
| <input type="checkbox"/> Would not refer                                                                                    | <input type="checkbox"/> Acupuncture                             |
| <input type="checkbox"/> Medical Specialist                                                                                 | <input type="checkbox"/> Rehabilitation Clinic                   |
| <input type="checkbox"/> General Practitioner                                                                               | <input type="checkbox"/> Refer for prescription Paracetamol      |
| <input type="checkbox"/> Other Chiropractor                                                                                 | <input type="checkbox"/> Refer for prescription NSAIDs           |
| <input type="checkbox"/> Physiotherapy                                                                                      | <input type="checkbox"/> Refer for prescription Muscle relaxants |
| <input type="checkbox"/> Refer to clinic specializing in formal programs of active supervised exercise & education for back | <input type="checkbox"/> Refer for prescription Opioids          |
| <input type="checkbox"/> Pain Clinic                                                                                        |                                                                  |
| <input type="checkbox"/> Other (please specify)                                                                             |                                                                  |

## Part 5: Clinical Vignette #6 continued

A 50-year old real estate agent consults you for his low-back pain with radiation to the left leg especially the posterior calf and lateral foot. The pain has been present for 12 weeks, starting two days after a weekend of heavy work in the garden. Today he describes the pain as a sharp pain (5 to 6 out of 10). He has had previous, similar episodes of low-back pain with radiation to the leg that have lasted one to two weeks. He has no other health concerns. On physical examination, he has some sensory deficit in the posterior calf and lateral foot and a diminished ankle reflex but no motor weakness. Straight leg raising is limited to 45 degrees in the affected leg.

# A survey of the attitudes of Dutch chiropractors towards the use of

## \*129. What kind of medical specialist would you refer?

- Neurologist
- Orthopaedist
- Rheumatologist
- Other (please specify)

## \*130. For what treatment would you refer to a medical specialist?

- Injections (eg. trigger point, facet, epidural)
- Surgery
- Second Opinion
- Other (please specify)

## \*131. Hospitalization

### Would you refer the patient for admission to hospital?

- Definitely
- Probably
- Probably not
- Definitely not

## Part 5: Clinical Vignette #6 continued

A 50-year old real estate agent consults you for his low-back pain with radiation to the left leg especially the posterior calf and lateral foot. The pain has been present for 12 weeks, starting two days after a weekend of heavy work in the garden. Today he describes the pain as a sharp pain (5 to 6 out of 10). He has had previous, similar episodes of low-back pain with radiation to the leg that have lasted one to two weeks. He has no other health concerns. On physical examination, he has some sensory deficit in the posterior calf and lateral foot and a diminished ankle reflex but no motor weakness. Straight leg raising is limited to 45 degrees in the affected leg.

The following questions are about the SPECIFIC advice you will give this patient.

## A survey of the attitudes of Dutch chiropractors towards the use of

### \*132. Return to work

**The patient described in the vignette asks what your advice would be about her work. Please tick the one response that best describes what you would recommend this patient to do.**

**I would recommend this patient to:**

- Return to normal work
- Return to part time or light duties
- Be off work until pain has improved
- Be off work until pain has completely disappeared
- Be off work for a further..... weeks (please state number of weeks)

### \*133. Activity

**The patient described in the vignette asks what your advice would be about activity. Please tick the one response that best describes what you would recommend this patient to do.**

**I would recommend this patient to:**

- Activity Perform usual activities
- Perform activities within the patient's tolerance
- Perform only pain free activities
- Limit all physical activities until pain disappears

### \*134. Bedrest

**The patient described in the vignette asks what your advice would be about bedrest. Please tick the one response that best describes what you would recommend this patient to do.**

**I would recommend this patient to:**

- Avoid resting in bed entirely
- Avoid resting in bed as much as possible
- Rest in bed only when pain is severe
- Rest in bed until pain improves substantially
- Rest in bed until pain disappears

**Part 5: Clinical Vignette #6 continued**

## A survey of the attitudes of Dutch chiropractors towards the use of

A 50-year old real estate agent consults you for his low-back pain with radiation to the left leg especially the posterior calf and lateral foot. The pain has been present for 12 weeks, starting two days after a weekend of heavy work in the garden. Today he describes the pain as a sharp pain (5 to 6 out of 10). He has had previous, similar episodes of low-back pain with radiation to the leg that have lasted one to two weeks. He has no other health concerns. On physical examination, he has some sensory deficit in the posterior calf and lateral foot and a diminished ankle reflex but no motor weakness. Straight leg raising is limited to 45 degrees in the affected leg.

### \*135. Clinical Vignette # 6 (continued)

**The patient described in Vignette #6 now comes in on a very busy day at the practice and there are many patients already in the waiting room wanting to see you. The patient has seen you weekly over the last four weeks for her low-back pain and complains that it is not improving. He is frustrated with his lack of improvement and thinks something different needs to be done. He is dissatisfied that he has not already been referred for further investigation, and insists that you refer him now.**

**What (if any) additional investigations, treatments or referral would you order, refer for or recommend?**

### Part 5: Clinical vignette #6 End

This is the end of vignette #6.  
Please press next to go to Part 6 (the last part).

### Part 6: Attitudes and beliefs of chiropractic towards back pain

This section contains questions about your perception of back pain.

# A survey of the attitudes of Dutch chiropractors towards the use of

## \*136. Perception of back pain

|                                                                                        | Totally agree         | Largely agree         | Agree to some extent  | Disagree to some extent | Largely disagree      | Totally disagree      |
|----------------------------------------------------------------------------------------|-----------------------|-----------------------|-----------------------|-------------------------|-----------------------|-----------------------|
| Back pain sufferers should refrain from all physical activity in order to avoid injury | <input type="radio"/> | <input type="radio"/> | <input type="radio"/> | <input type="radio"/>   | <input type="radio"/> | <input type="radio"/> |
| Good posture prevents back pain                                                        | <input type="radio"/> | <input type="radio"/> | <input type="radio"/> | <input type="radio"/>   | <input type="radio"/> | <input type="radio"/> |
| Knowledge of the tissue damage is not necessary for effective therapy                  | <input type="radio"/> | <input type="radio"/> | <input type="radio"/> | <input type="radio"/>   | <input type="radio"/> | <input type="radio"/> |
| Reduction of daily physical exertion is a significant factor in treating back pain     | <input type="radio"/> | <input type="radio"/> | <input type="radio"/> | <input type="radio"/>   | <input type="radio"/> | <input type="radio"/> |
| Not enough effort is made to find the underlying organic causes of back pain           | <input type="radio"/> | <input type="radio"/> | <input type="radio"/> | <input type="radio"/>   | <input type="radio"/> | <input type="radio"/> |
| Mental stress can cause back pain even in the absence of tissue damage                 | <input type="radio"/> | <input type="radio"/> | <input type="radio"/> | <input type="radio"/>   | <input type="radio"/> | <input type="radio"/> |
| The cause of back pain is unknown                                                      | <input type="radio"/> | <input type="radio"/> | <input type="radio"/> | <input type="radio"/>   | <input type="radio"/> | <input type="radio"/> |
| Unilateral physical stress is not a cause of back pain                                 | <input type="radio"/> | <input type="radio"/> | <input type="radio"/> | <input type="radio"/>   | <input type="radio"/> | <input type="radio"/> |
| Patients who have suffered back pain should avoid activities that stress the back      | <input type="radio"/> | <input type="radio"/> | <input type="radio"/> | <input type="radio"/>   | <input type="radio"/> | <input type="radio"/> |
| Pain is a nociceptive stimulus, indicating tissue damage                               | <input type="radio"/> | <input type="radio"/> | <input type="radio"/> | <input type="radio"/>   | <input type="radio"/> | <input type="radio"/> |

## Part 6: Attitudes and beliefs of chiropractic towards back pain

## \*137. Perception of back pain

|                                                                                         | Totally agree         | Largely agree         | Agree to some extent  | Disagree to some extent | Largely disagree      | Totally disagree      |
|-----------------------------------------------------------------------------------------|-----------------------|-----------------------|-----------------------|-------------------------|-----------------------|-----------------------|
| A patient suffering from severe back pain will benefit from physical exercise           | <input type="radio"/> | <input type="radio"/> | <input type="radio"/> | <input type="radio"/>   | <input type="radio"/> | <input type="radio"/> |
| Functional limitations associated with back pain are the result of psychosocial factors | <input type="radio"/> | <input type="radio"/> | <input type="radio"/> | <input type="radio"/>   | <input type="radio"/> | <input type="radio"/> |
| The best advice for back pain is: 'Take care' and 'Make no unnecessary movements'       | <input type="radio"/> | <input type="radio"/> | <input type="radio"/> | <input type="radio"/>   | <input type="radio"/> | <input type="radio"/> |
| Patients with back pain should preferably practice only pain free movements             | <input type="radio"/> | <input type="radio"/> | <input type="radio"/> | <input type="radio"/>   | <input type="radio"/> | <input type="radio"/> |
| Back pain indicates that there is something dangerously wrong with the back             | <input type="radio"/> | <input type="radio"/> | <input type="radio"/> | <input type="radio"/>   | <input type="radio"/> | <input type="radio"/> |
| The way patients view their pain influences the progress of the symptoms                | <input type="radio"/> | <input type="radio"/> | <input type="radio"/> | <input type="radio"/>   | <input type="radio"/> | <input type="radio"/> |
| Therapy may have been successful even if pain remains                                   | <input type="radio"/> | <input type="radio"/> | <input type="radio"/> | <input type="radio"/>   | <input type="radio"/> | <input type="radio"/> |
| Therapy can completely alleviate the functional symptoms caused by back pain            | <input type="radio"/> | <input type="radio"/> | <input type="radio"/> | <input type="radio"/>   | <input type="radio"/> | <input type="radio"/> |
| If ADL activities cause more back pain, this is not dangerous                           | <input type="radio"/> | <input type="radio"/> | <input type="radio"/> | <input type="radio"/>   | <input type="radio"/> | <input type="radio"/> |
| Back pain indicates the presence of organic injury                                      | <input type="radio"/> | <input type="radio"/> | <input type="radio"/> | <input type="radio"/>   | <input type="radio"/> | <input type="radio"/> |

## Part 6: Attitudes and beliefs of chiropractic towards back pain

# A survey of the attitudes of Dutch chiropractors towards the use of

## \*138. Perception of back pain

|                                                                                                                      | Totally agree         | Largely agree         | Agree to some extent  | Disagree to some extent | Largely disagree      | Totally disagree      |
|----------------------------------------------------------------------------------------------------------------------|-----------------------|-----------------------|-----------------------|-------------------------|-----------------------|-----------------------|
| Sport should not be recommended for patients with back pain                                                          | <input type="radio"/> | <input type="radio"/> | <input type="radio"/> | <input type="radio"/>   | <input type="radio"/> | <input type="radio"/> |
| If back pain increases in severity, I immediately adjust the intensity of my treatment accordingly                   | <input type="radio"/> | <input type="radio"/> | <input type="radio"/> | <input type="radio"/>   | <input type="radio"/> | <input type="radio"/> |
| If therapy does not result in a reduction in back pain, there is a high risk of severe restrictions in the long term | <input type="radio"/> | <input type="radio"/> | <input type="radio"/> | <input type="radio"/>   | <input type="radio"/> | <input type="radio"/> |
| Pain reduction is a precondition for the restoration of normal functioning                                           | <input type="radio"/> | <input type="radio"/> | <input type="radio"/> | <input type="radio"/>   | <input type="radio"/> | <input type="radio"/> |
| Increased pain indicates new tissue damage or the spread of existing damage                                          | <input type="radio"/> | <input type="radio"/> | <input type="radio"/> | <input type="radio"/>   | <input type="radio"/> | <input type="radio"/> |
| It is the task of the chiropractor to remove the cause of back pain                                                  | <input type="radio"/> | <input type="radio"/> | <input type="radio"/> | <input type="radio"/>   | <input type="radio"/> | <input type="radio"/> |
| There is no effective treatment to eliminate back pain                                                               | <input type="radio"/> | <input type="radio"/> | <input type="radio"/> | <input type="radio"/>   | <input type="radio"/> | <input type="radio"/> |
| TENS and/or back braces support functional recovery                                                                  | <input type="radio"/> | <input type="radio"/> | <input type="radio"/> | <input type="radio"/>   | <input type="radio"/> | <input type="radio"/> |

## Part 6: Attitudes and beliefs of chiropractic towards back pain

## \*139. Perception of back pain

|                                                                                              | Totally agree         | Largely agree         | Agree to some extent  | Disagree to some extent | Largely disagree      | Totally disagree      |
|----------------------------------------------------------------------------------------------|-----------------------|-----------------------|-----------------------|-------------------------|-----------------------|-----------------------|
| Even if the pain has worsened, the intensity of the next treatment can be increased          | <input type="radio"/> | <input type="radio"/> | <input type="radio"/> | <input type="radio"/>   | <input type="radio"/> | <input type="radio"/> |
| If patients complain of pain during exercise, I worry that damage is being caused            | <input type="radio"/> | <input type="radio"/> | <input type="radio"/> | <input type="radio"/>   | <input type="radio"/> | <input type="radio"/> |
| The severity of tissue damage determines the level of pain                                   | <input type="radio"/> | <input type="radio"/> | <input type="radio"/> | <input type="radio"/>   | <input type="radio"/> | <input type="radio"/> |
| A rapid resumption of daily activities is an important goal of the treatment                 | <input type="radio"/> | <input type="radio"/> | <input type="radio"/> | <input type="radio"/>   | <input type="radio"/> | <input type="radio"/> |
| Learning to cope with stress promotes recovery from back pain                                | <input type="radio"/> | <input type="radio"/> | <input type="radio"/> | <input type="radio"/>   | <input type="radio"/> | <input type="radio"/> |
| Exercises that may be back straining should not be avoided during the treatment              | <input type="radio"/> | <input type="radio"/> | <input type="radio"/> | <input type="radio"/>   | <input type="radio"/> | <input type="radio"/> |
| In the long run, patients with back pain have a higher risk of developing spinal impairments | <input type="radio"/> | <input type="radio"/> | <input type="radio"/> | <input type="radio"/>   | <input type="radio"/> | <input type="radio"/> |
| In back pain, imaging tests are unnecessary                                                  | <input type="radio"/> | <input type="radio"/> | <input type="radio"/> | <input type="radio"/>   | <input type="radio"/> | <input type="radio"/> |

## End of Survey

Thank you very much for taking the time to fill out this questionnaire.
